# Supplementary material for: A novel porous carbon material derived from the byproducts of bean curd stick manufacture for high-performance supercapacitor use
Source: Royal Society of Chemistry journal article supplement (doi:10.1039/c8ra08664h), 2018-01-01
Supplement: c8ra08664h1.pdf [file c8ra08664h1.pdf]

# Supporting Information

## A novel porous carbon materials derived from the byproducts of bean curd stick manufacture for high performance supercapacitor

**Lulu Shi, Lihua Jin\*, Zheng Meng, Yanan Sun, Cong Li, and Yehua Shen**

Key Laboratory of Synthetic and Natural Functional Molecule Chemistry of the Ministry of Education, College of Chemistry & Materials Science, Northwest University, Xi'an 710069, People's Republic of China

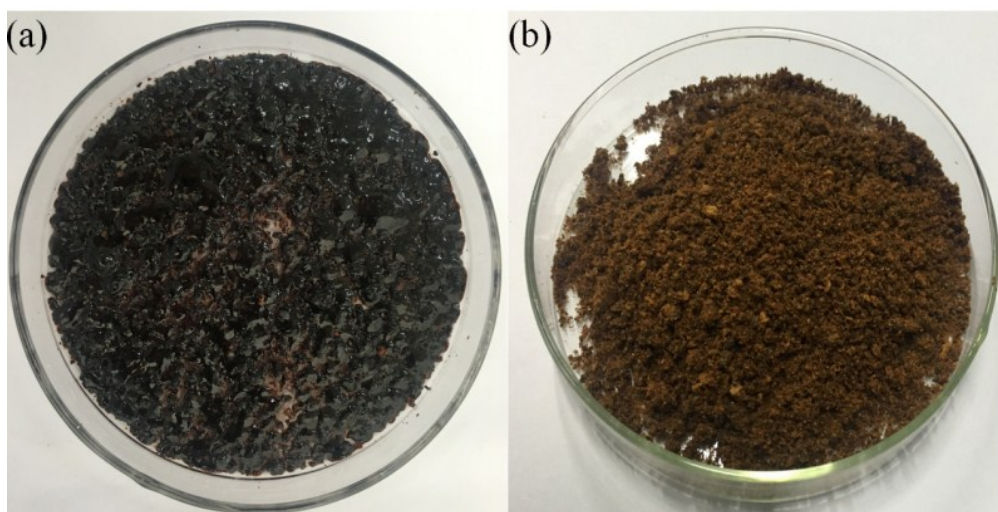

**Fig. S1.** The picture of hydrothermal products dried by oven and freeze dryer.

---

\* To whom correspondence should be addressed. Fax: +86-029-88302635. E-mail: [jinlihua@nwu.edu.cn](mailto:jinlihua@nwu.edu.cn).

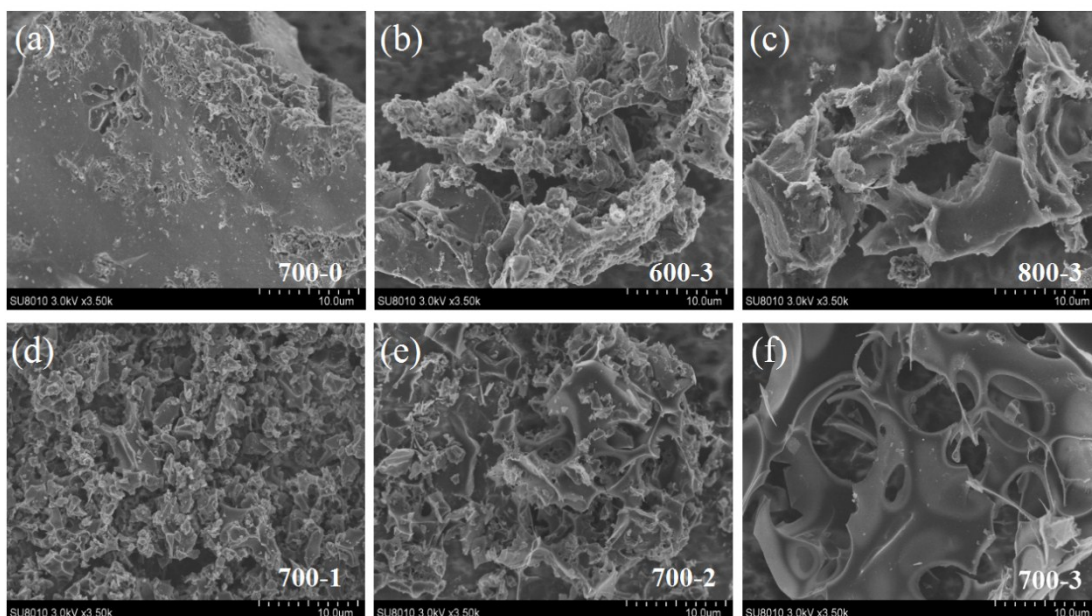

**Fig. S2** SEM images of (a) 700-0 (b) 600-3 (c) 800-3 (d) 700-1 (e) 700-2 and (f) 700-3 samples.

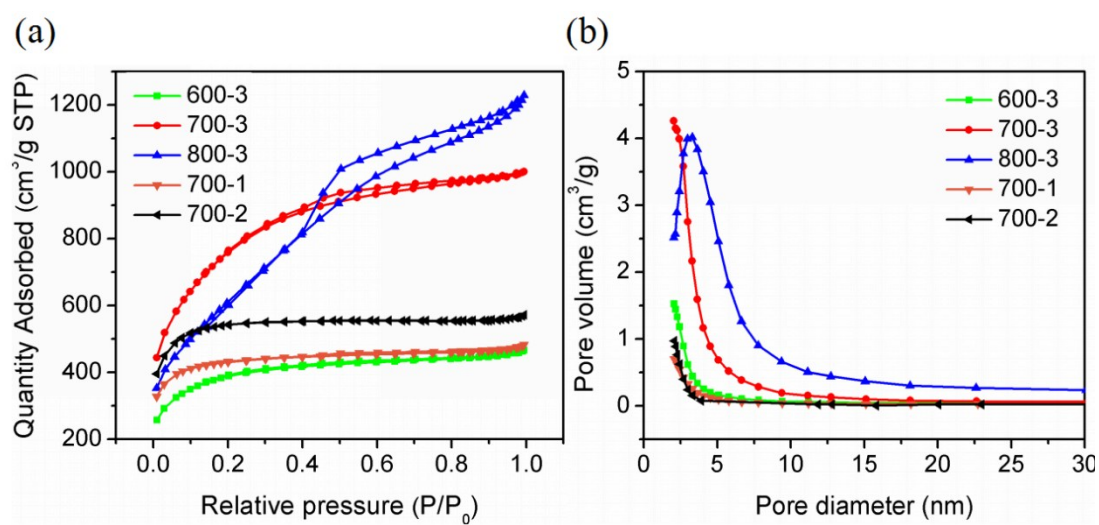

**Fig. S3** (a)  $N_2$  sorption-desorption isotherm and (d) pore size distribution of C-BCS samples.
